# Supplementary material for: Encapsulation of 2D MoS2 nanosheets into 1D carbon nanobelts as anodes with enhanced lithium/sodium storage properties
Source: Royal Society of Chemistry journal article supplement (doi:10.1039/d1tc05635b), 2022-01-01
Supplement: d1tc05635b1.pdf [file d1tc05635b1.pdf]

# Encapsulation of 2D MoS<sub>2</sub> Nanosheets into 1D Carbon Nanobelts as Anodes with Enhanced Lithium/Sodium Storage Properties

Bingqing Ye<sup>1</sup>, Lei Xu<sup>1</sup>, Wenbo Wu<sup>1</sup>, Yuliang Ye<sup>1</sup>, Zunxian Yang<sup>\*1,2</sup>, Jingwei Ai<sup>1</sup>, Yinglin Qiu<sup>1</sup>, Zhipeng Gong<sup>1</sup>, Yuanqing Zhou<sup>1</sup>, Qiaocan Huang<sup>1</sup>, Zihong Shen<sup>1</sup>, Fushan Li<sup>1,2</sup>, Tailiang Guo<sup>1,2</sup>, Sheng Xu<sup>1,2</sup>

<sup>1</sup>National & Local United Engineering Laboratory of Flat Panel Display Technology, Fuzhou University, Fuzhou 350108, P. R. China.

<sup>2</sup>Mindu Innovation Laboratory, Fujian Science & Technology Innovation Laboratory For Optoelectronic Information of China, Fuzhou, 350108, P.R. China

## Supporting Information

### Captions

**Table S1** A comparison of the cycling performance of MoS<sub>2</sub>@C with the recently reported MoS<sub>2</sub>/C- based anode materials for Li-ion batteries in other literature.

**Fig.S1** XRD patterns of pure  $\alpha$ -MoO<sub>3</sub> NBs, MoO<sub>3</sub>@C-22 NBs, MoO<sub>3</sub>@C-23 NBs,

---

\* Corresponding author should be addressed. Tel.: +86 591 8789 3299; Fax: +86 591 8789 2643  
E-mail: yangzunxian@hotmail.com (Z. Yang)

MoO<sub>3</sub>@C-24 NBs, and MoO<sub>3</sub>@C-25 NBs, respectively.

**Fig.S2** TGA curve of MoS<sub>2</sub>@C-23 NBs.

**Fig.S3 (a)** N<sub>2</sub> adsorption-desorption isotherms and **(b)** pore size distribution of MoS<sub>2</sub>@C-23 NBs.

**Fig.S4 (a)** Low-magnification and **(b)** High-magnification SEM image of pure MoS<sub>2</sub> nanosheets.

**Fig.S5 (a, b)** Low-magnification and **(c, d)** High-magnification TEM images of MoS<sub>2</sub>@C-23 NBs.

**Fig.S6** SEM images of **(a)** MoO<sub>3</sub>@C-22 NBs, **(b)** MoO<sub>3</sub>@C-24 NBs, **(c)** MoO<sub>3</sub>@C-25 NBs, **(d)** MoS<sub>2</sub>@C-22 NBs, **(e)** MoS<sub>2</sub>@C-24 NBs, and **(f)** MoS<sub>2</sub>@C-25 NBs.

**Fig.S7 (a)** TEM image of MoO<sub>3</sub>@C-13 NBs. **(b)** TEM image of MoO<sub>3</sub>@C-33 NBs.

**Fig.S8 (a, b)** SEM images of MoS<sub>2</sub>@C-13 NBs. **(c)** Low-magnification and **(d)** High-magnification SEM images of MoS<sub>2</sub>@C-33 NBs.

**Fig.S9** XRD patterns of MoS<sub>2</sub>@C-13 NBs and MoS<sub>2</sub>@C-33 NBs.

**Fig.S10 (a, b)** SEM images, **(c)** TEM image, **(d)** HRTEM image, **(e)** XRD patterns, and **(f-i)** EDS mapping of C@MoS<sub>2</sub>.

**Fig.S11** Rate capability of MoS<sub>2</sub>@C-22 NBs, MoS<sub>2</sub>@C-24 NBs, and MoS<sub>2</sub>@C-25 NBs cycled at various rates from 0.1 to 2.0 Ag<sup>-1</sup>.

**Fig.S12** Rate capability of MoS<sub>2</sub>@C cycled at various rates from 0.1 to 2.0 Ag<sup>-1</sup>.

**Fig.S13** Cycling performance of MoS<sub>2</sub>@C-22 NBs, MoS<sub>2</sub>@C-24 NBs, and MoS<sub>2</sub>@C-25 NBs at a current density of 0.2 Ag<sup>-1</sup>.

**Fig. S14** Cycling performance of C@MoS<sub>2</sub> at a current density of 0.2 Ag<sup>-1</sup>.

**Fig. S15** SEM images of MoS<sub>2</sub>@C-23 NBs after 200 cycles.

**Fig. S16 (a)** EIS and **(b)** plots of  $Z'$  vs.  $\omega^{-1/2}$  of MoS<sub>2</sub>@C-22 NBs, MoS<sub>2</sub>@C-24 NBs, and MoS<sub>2</sub>@C-25 NBs.

**Fig. S17 (a)** EIS and **(b)** plots of  $Z'$  vs.  $\omega^{-1/2}$  of C@MoS<sub>2</sub>.

**Table S1.**

| MoS <sub>2</sub> /C-based anode materials                  | Current density (mA g <sup>-1</sup> ) | (Cycles) | Capacity (mAh g <sup>-1</sup> ) | Reference |
|------------------------------------------------------------|---------------------------------------|----------|---------------------------------|-----------|
| MoS <sub>2</sub> @NSC nanoprisms                           | 100                                   | 300      | 800                             | [1]       |
| 3DANCNT@MoS <sub>2</sub> composite                         | 200                                   | 200      | 893.4                           | [2]       |
|                                                            | 1600                                  | 200      | 645                             |           |
| MoS <sub>2</sub> /N-CNT                                    | 200                                   | 100      | 1115                            | [3]       |
| MoS <sub>2</sub> @C nanospheres                            | 100                                   | 100      | 1119                            | [4]       |
|                                                            | 2000                                  | 500      | 530                             |           |
| CNT@MoS <sub>2</sub> @C                                    | 100                                   | 200      | 982                             | [5]       |
| MoS <sub>2</sub> @PZS-C nanospheres                        | 100                                   | 100      | 1245                            | [6]       |
| MoS <sub>2</sub> @C/MoS <sub>2</sub> core–Sheath nanowires | 100                                   | 150      | 838                             | [7]       |
| MoS <sub>2</sub> nanosheets/ N, O-codoped carbon matrix    | 67                                    | 100      | 946.3                           | [8]       |
| Bowl-like C@MoS <sub>2</sub> nanocomposites                | 100                                   | 100      | 798                             | [9]       |
|                                                            | 1000                                  | 1000     | 526                             |           |
| MoS <sub>2</sub> /N-doped carbon nanobelts                 | 100                                   | 100      | 901                             | [10]      |
|                                                            | 1000                                  | 500      | 675                             |           |
| C@MoS <sub>2</sub> @NC hollow spheres                      | 100                                   | 10       | 747                             | [11]      |
| 3D FNC-MoS <sub>2</sub> nanospheres                        | 100                                   | 50       | 920                             | [12]      |
|                                                            | 1200                                  | 400      | 700                             |           |
| NC@MoS <sub>2</sub> @C nanotubes                           | 100                                   | 100      | 663.3                           | [13]      |
|                                                            | 1000                                  | 500      | 703.5                           |           |
| MoS <sub>2</sub> -PVP@NC nanospheres                       | 1000                                  | 300      | 607.1                           | [14]      |
| MoS <sub>2</sub> @C-23 NBs                                 | 200                                   | 200      | 1189                            | This work |
|                                                            | 1000                                  | 800      | 626                             |           |

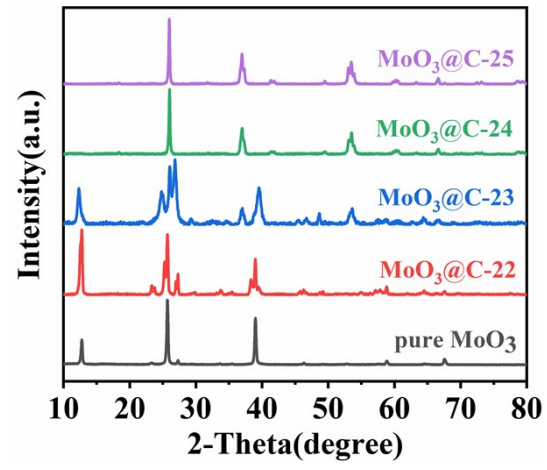

**Fig.S1**

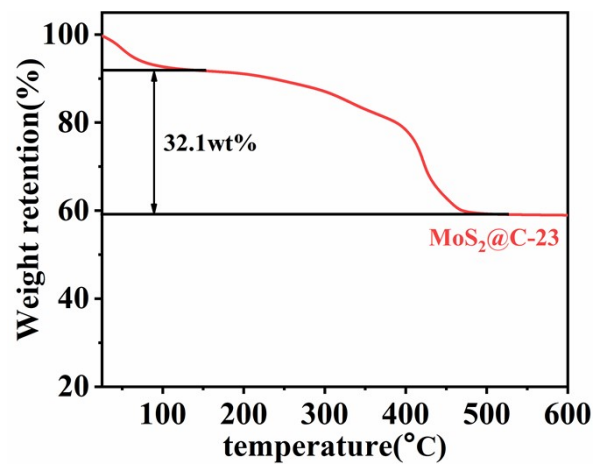

Fig.S2

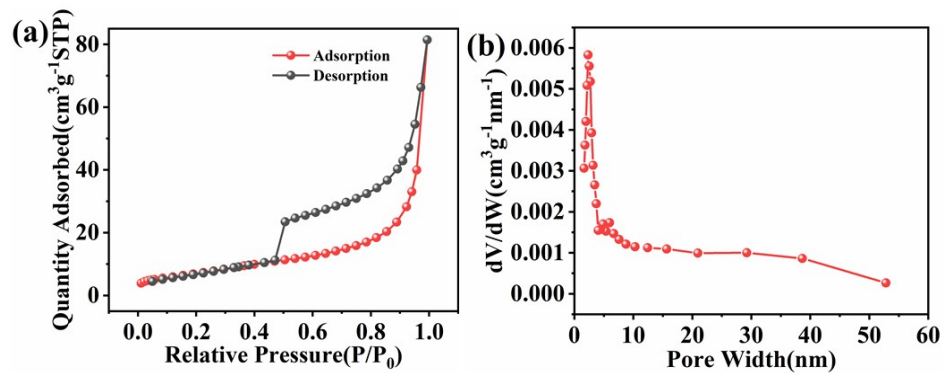

Fig.S3

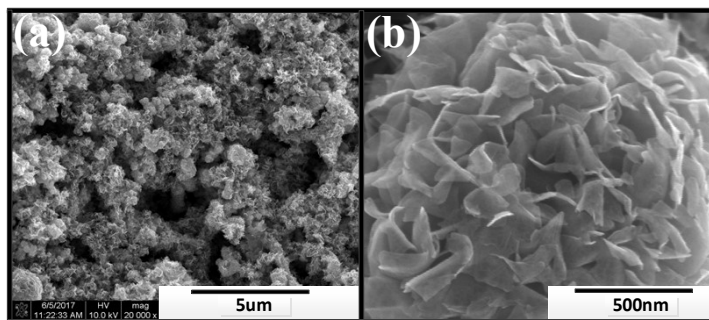

**Fig.S4**



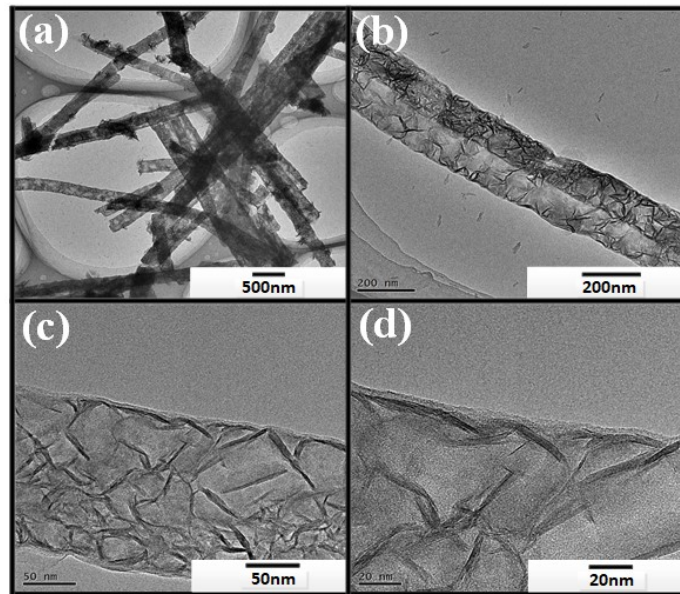

**Fig.S5**

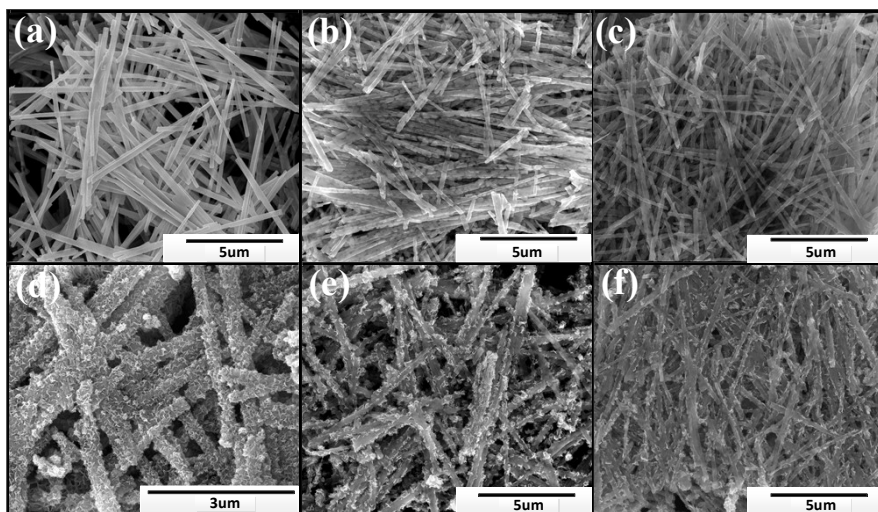

**Fig.S6**

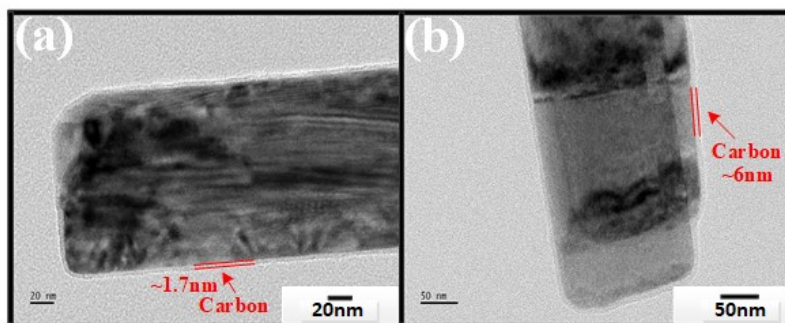

**Fig.S7**

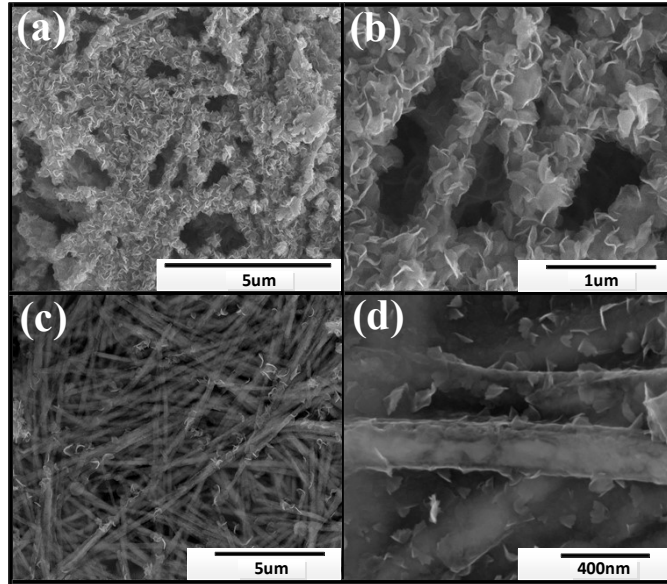

**Fig.S8**

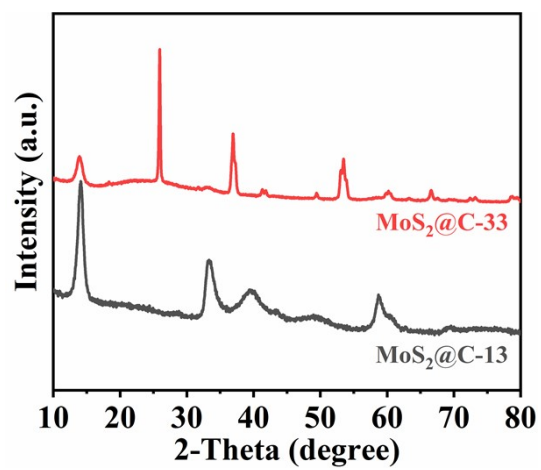

**Fig.S9**

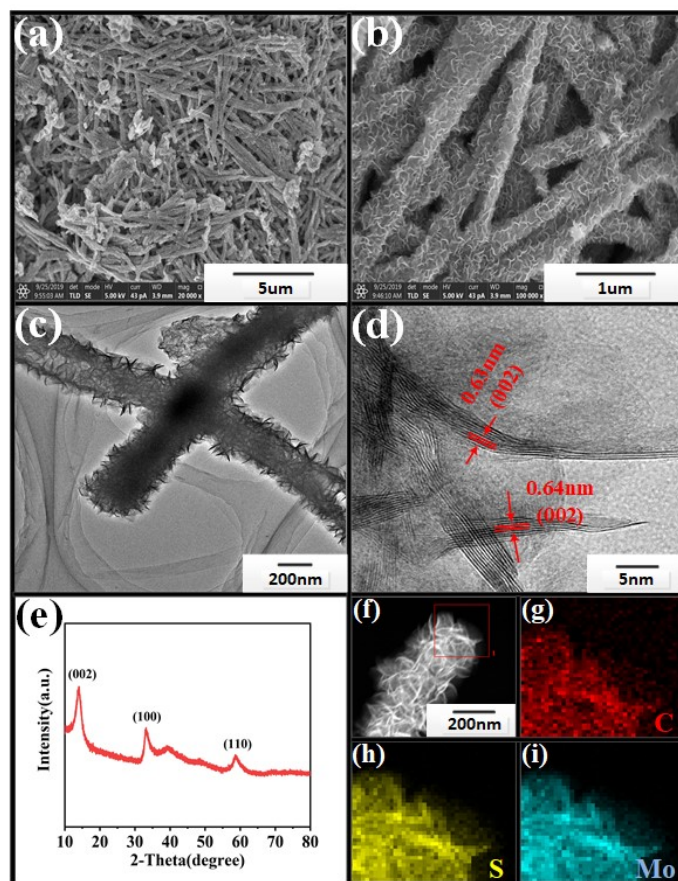

Fig.S10

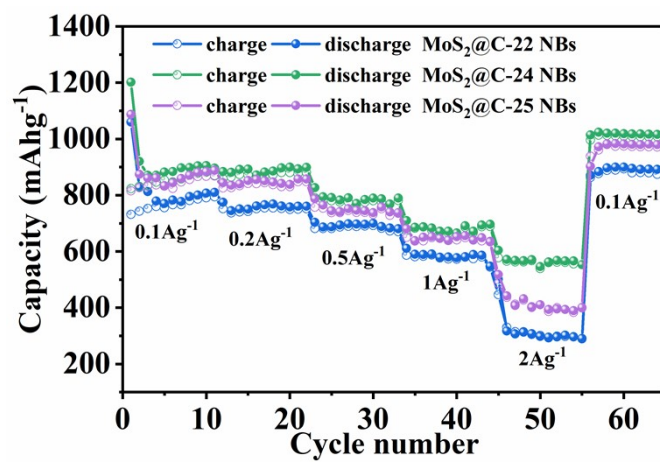

Fig.S11

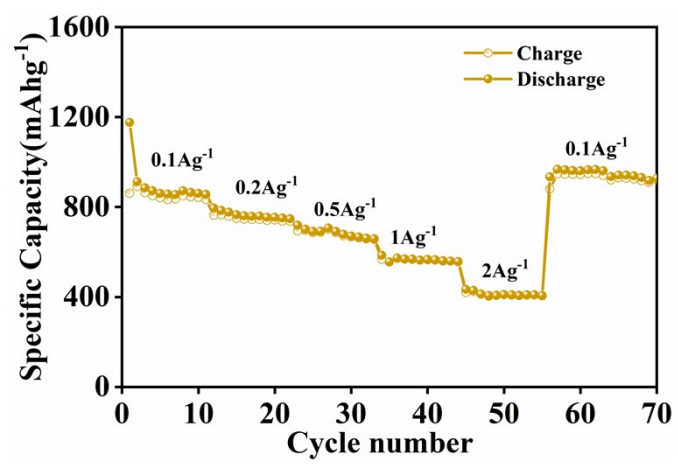

Fig.S12



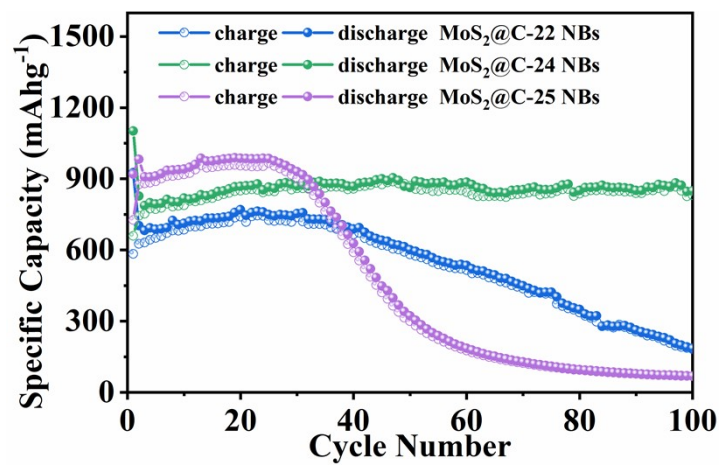

Fig.S13

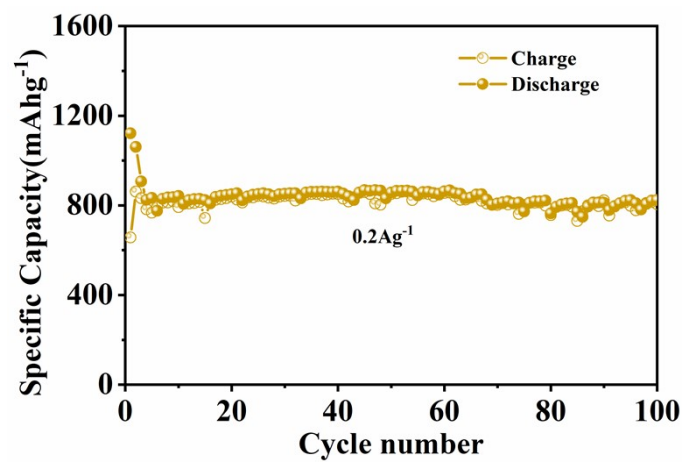

**Fig. S14**

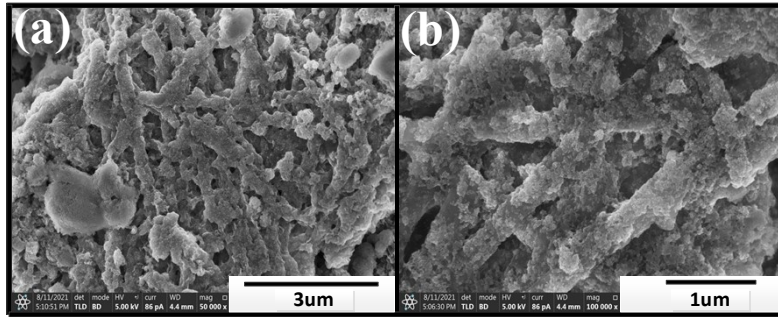

**Fig. S15**

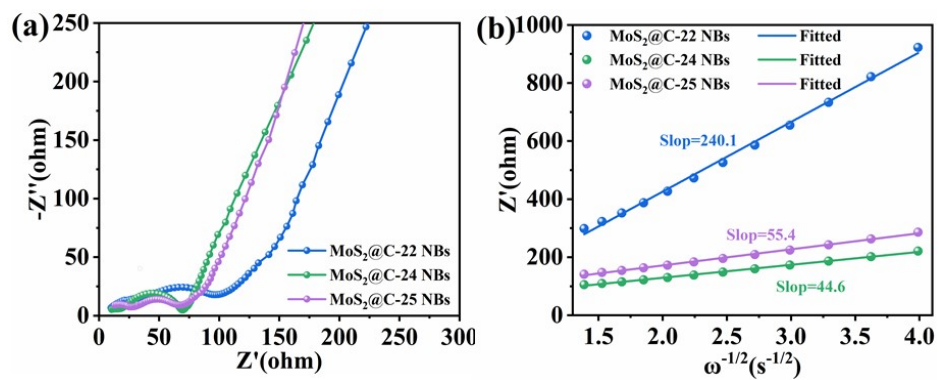

Fig. S16

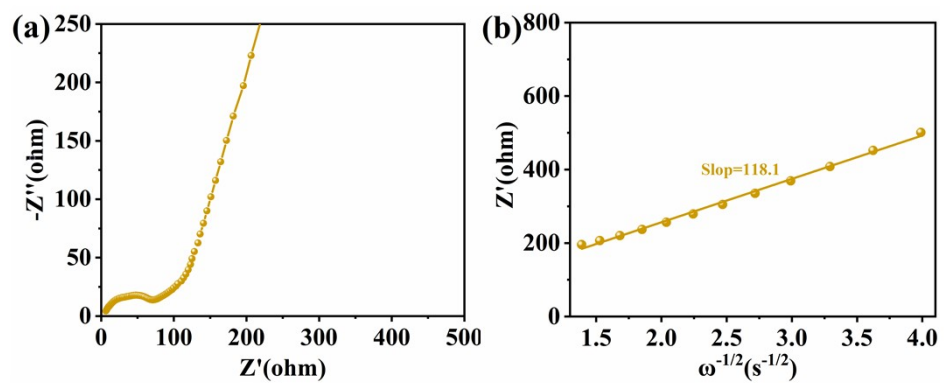

**Fig. S17**

## References

- [1] Y. Liu, J. Zhu, J. Xu, S. Liu, L. Li, C. Zhang, T. Liu, High-temperature solvent-free sulfidation of MoO<sub>3</sub> confined in a polypyrrole shell: MoS<sub>2</sub> nanosheets encapsulated in a nitrogen, sulfur dual-doped carbon nanoprism for efficient lithium storage. **Nanoscale**, **2018**, **10**(16): 7536-7543.
- [2] X. J. Zhao, G. Wang, X. J. Liu, X. L. Zheng, H. Wang, Ultrathin MoS<sub>2</sub> with expanded interlayers supported on hierarchical polypyrrole-derived amorphous N-doped carbon tubular structures for high-performance Li/Na-ion batteries. **Nano Research**, **2018**, **11**(7): 3603-3618.
- [3] T. J. Wu, M. J. Jing, Y. Liu, X. B. Ji, Binding low crystalline MoS<sub>2</sub> nanoflakes on nitrogen-doped carbon nanotube: towards high-rate lithium and sodium storage. **Journal of Materials Chemistry A**, **2019**, **7**(11): 6439-6449.
- [4] J. G. Wang, H. Y. Liu, R. Zhou, X. R. Liu, B. Q. Wei, Onion-like nanospheres organized by carbon encapsulated few-layer MoS<sub>2</sub> nanosheets with enhanced lithium storage performance. **Journal of Power Sources**, **2019**, **413**: 327-333.
- [5] Z. J. Zhang, H. L. Zhao, Y. Q. Teng, X. W. Chang, Q. Xia, Z. L. Li, J. J. Fang, Z. H. Du, K. Swierczek, Carbon-Sheathed MoS<sub>2</sub> Nanothorns Epitaxially Grown on CNTs: Electrochemical Application for Highly Stable and Ultrafast Lithium Storage. **Advanced Energy Materials**, **2018**, **8**(7): 1700174.
- [6] Z. P. Zhou, F. Chen, L. Wu, T. R. Kuang, X. H. Liu, J. T. Yang, P. Fan, Z. D. Fei, Z. P. Zhao, M. Q. Zhong, Heteroatoms-doped 3D carbon nanosphere cages embedded

with MoS<sub>2</sub> for lithium-ion battery. **Electrochimica Acta**, **2020**, **332**: 135490.

[7] H. H. Sun, J. G. Wang, X. Z. Zhang, C. J. Li, F. Liu, W. J. Zhu, W. Hua, Y. Y. Li, M. H. Shao, Nanoconfined Construction of MoS<sub>2</sub>@C/MoS<sub>2</sub> Core-Sheath Nanowires for Superior Rate and Durable Li-Ion Energy Storage. **Acs Sustainable Chemistry & Engineering**, **2019**, **7**(5): 5346-5354.

[8] M. S. Han, Z. J. Lin, J. Yu, Ultrathin MoS<sub>2</sub> nanosheets homogenously embedded in aN,O-codoped carbon matrix for high-performance lithium and sodium storage. **Journal of Materials Chemistry A**, **2019**, **7**(9): 4804-4812.

[9] X. E. Zhang, X. Chen, H. J. Ren, G. W. Diao, M. Chen, S. W. Chen, Bowl-like C@MoS<sub>2</sub> Nanocomposites as Anode Materials for Lithium-Ion Batteries: Enhanced Stress Buffering and Charge/Mass Transfer. **Acs Sustainable Chemistry & Engineering**, **2020**, **8**(27): 10065-10072.

[10] H. H. Sun, J. G. Wang, W. Hua, J. J. Wang, D. Nan, B. H. Guo, Hierarchical MoS<sub>2</sub>/N-doped carbon nanobelts assembled by interlaced nanosheets as high performance Li-ion battery anode. **Journal of Alloys and Compounds**, **2020**, **821**: 153339.

[11] F. Z. Wang, F. G. Li, L. Ma, M. J. Zheng, Few-Layer MoS<sub>2</sub> Nanosheets Encapsulated in N-Doped Carbon Hollow Spheres as Long-Life Anode Materials for Lithium-Ion Batteries. **Chemistry-a European Journal**, **2019**, **25**(64): 14598-14603.

[12] Xin Wang, Siming Fei, Shoushuang Huang, Chenghao Wu, Junru Zhao, Zhiwen Chen, Kajsa Uvdal, Zhangjun Hu, MoS<sub>2</sub> nanosheets inlaid in 3D fibrous N-doped carbon spheres for lithium-ion batteries and electrocatalytic hydrogen evolution

reaction. **Carbon**, **2019**, **150**: 363-370.

[13] J. G. Zong, F. Wang, J. P. Zhao, X. Fan, M. S. Zhao, S. Yang, X. P. Song, Rational design of strong chemical coupling carbon coated N-doped C@MoS<sub>2</sub>@C nanotubes for high-performance lithium storage. **Journal of Alloys and Compounds**, **2021**, **861**: 157981.

[14] J. Bai, B. C. Zhao, X. Wang, H. Y. Ma, K. Z. Li, Z. T. Fang, H. Li, J. M. Dai, X. B. Zhu, Y. P. Sun, Yarn ball-like MoS<sub>2</sub> nanospheres coated by nitrogen-doped carbon for enhanced lithium and sodium storage performance. **Journal of Power Sources**, **2020**, **465**: 228282.
